# Supplementary material for: Low Glucose Mediated Fluconazole Tolerance in Cryptococcus neoformans
Source: J Fungi (Basel). 2021 Jun 18;7(6):489. doi: 10.3390/jof7060489 (PMC8233753; doi:10.3390/jof7060489)
Supplement: Supplementary file 1 [file jof-07-00489-s001.zip]

Archive with 4 entries (4 files):
- Fig S1_Gene_Duplication.tiff
- Table S1_List of Strains.pdf
- Table S2_Oligonucleotides_Used.pdf
- Table S3_Ergosterol_Gene_Expression.pdf
