# Supplementary material for: Low Glucose Mediated Fluconazole Tolerance in Cryptococcus neoformans
Source: J Fungi (Basel). 2021 Jun 18;7(6):489. doi: 10.3390/jof7060489 (PMC8233753; doi:10.3390/jof7060489)
Supplement: Supplementary file 1 [file jof-07-00489-s001.zip › Table S1_List of Strains.pdf]

**Table S1. Strains used in the study.**

| <i>C. neoformans</i> strains                    | Serotype | Source or Reference |
|-------------------------------------------------|----------|---------------------|
| H99                                             | A        | WT                  |
| KN99 $\alpha$                                   | A        | WT                  |
| RC2                                             | D        | ATCC 24067 variant  |
| JEC21                                           | D        | WT                  |
| H99 $\Delta$ <i>afr1</i>                        | A        | (1)                 |
| H99 $\Delta$ <i>afr2</i>                        | A        | (1)                 |
| H99 $\Delta$ <i>mdr1</i>                        | A        | (1)                 |
| H99 $\Delta$ <i>afr1</i> / $\Delta$ <i>afr2</i> | A        | (1)                 |
| I55                                             | A        | (2)                 |
| I114                                            | D        | (2)                 |
| J9                                              | D        | (2)                 |
| J22                                             | D        | (2)                 |

1. Chang M, Sionov E, Khanal Lamichhane A, Kwon-Chung KJ, Chang YC. 2018. Roles of Three *Cryptococcus neoformans* and *Cryptococcus gattii* Efflux Pump-Coding Genes in Response to Drug Treatment. *Antimicrob Agents Chemother* 62.
2. Bouklas T, Diago-Navarro E, Wang X, Fenster M, Fries BC. 2015. Characterization of the virulence of *Cryptococcus neoformans* strains in an insect model. *Virulence* 6:809-13.
