# Supplementary material for: Low Glucose Mediated Fluconazole Tolerance in Cryptococcus neoformans
Source: J Fungi (Basel). 2021 Jun 18;7(6):489. doi: 10.3390/jof7060489 (PMC8233753; doi:10.3390/jof7060489)
Supplement: Supplementary file 1 [file jof-07-00489-s001.zip › Table S2_Oligonucleotides_Used.pdf]

**Table S2. Oligonucleotides Used**

| <b>Gene Name</b>  | <b>Forward (5'-3')</b> | <b>Reverse (5'-3')</b> |
|-------------------|------------------------|------------------------|
| <i>ACT1</i>       | CCCACACTGTCCCCATTAC    | AACCACGCTCCATGAGAATC   |
| <i>SIR2</i>       | ATGAAGAACGCCATTTCCAC   | CTAGGCGGTTTCATCAGCTTC  |
| <i>CNAG_01019</i> | AACACCAACGGCTGTACCTC   | TTCGACCAATGATGGAGTGA   |
| <i>CNAG_04388</i> | TCCCACCTCTGGTGTCTTC    | TAGAAAGCGTGCTCCCAGAT   |
| <i>AFR1</i>       | CTTTCCGAGCTGGTGAATC    | CACCTTCGATCACACCAATG   |
| <i>AFR2</i>       | GGTTCCGACTACATGGCTGT   | GAGTTCACCAGCTCGGAAAG   |
| <i>MDR1</i>       | CTCTTGATCACATCGCGAAA   | ACCGACAATCTTGCTCTGCT   |
| <i>ERG11</i>      | CTGGCCAGCCATAAGAAGAG   | GTGAAAGCGACGTGAGTTGA   |
