# Supplementary material for: Low Glucose Mediated Fluconazole Tolerance in Cryptococcus neoformans
Source: J Fungi (Basel). 2021 Jun 18;7(6):489. doi: 10.3390/jof7060489 (PMC8233753; doi:10.3390/jof7060489)
Supplement: Supplementary file 1 [file jof-07-00489-s001.zip › Table S3_Ergosterol_Gene_Expression.pdf]

**Table S3: Expression of genes encoding ergosterol biosynthesis enzymes under low glucose compared to normal glucose**

| Gene ID    | Description                                                   | logFC    | P-Value                | Significant |
|------------|---------------------------------------------------------------|----------|------------------------|-------------|
| CNAG_03009 | ergosterol biosynthesis-related protein, putative             | -0.86773 | $2.03 \times 10^{-3}$  | YES         |
| CNAG_02830 | delta24(24-1) sterol reductase, putative                      | -0.83555 | $2.89 \times 10^{-5}$  | YES         |
| CNAG_04605 | C-3 sterol dehydrogenase (C-4 sterol decarboxylase), putative | -0.80161 | $4.77 \times 10^{-5}$  | YES         |
| CNAG_00519 | C-5 sterol desaturase, putative                               | -2.00565 | $9.68 \times 10^{-19}$ | YES         |
| CNAG_00854 | C-8 sterol isomerase, putative                                | -1.33191 | $1.33 \times 10^{-8}$  | YES         |
| CNAG_01737 | C-4 methyl sterol oxidase, putative                           | -1.06812 | $1.98 \times 10^{-4}$  | YES         |
| CNAG_00040 | sterol 14-demethylase, putative                               | -1.00762 | $3.04 \times 10^{-9}$  | YES         |
| CNAG_03819 | sterol 24-C-methyltransferase, putative                       | -1.06486 | $7.61 \times 10^{-7}$  | YES         |
| CNAG_02896 | hydroxymethylglutaryl-CoA synthase, putative                  | -0.78075 | $2.41 \times 10^{-6}$  | YES         |
| CNAG_06534 | hydroxymethylglutaryl-CoA reductase (NADPH), putative         | 1.07213  | $4.16 \times 10^{-5}$  | YES         |
